# Supplementary material for: Mindfulness and Affect During Mindfulness-Based Cognitive Therapy for Recurrent Depression: an Autoregressive Latent Trajectory Analysis
Source: Springer Nature journal article supplement (doi:10.1007/s12671-020-01453-z), 2020-08-07
Supplement: MOESM2 [file 18258710]

**Mindfulness and Affect during**

**Mindfulness-Based Cognitive Therapy for Recurrent Depression:**

**an Autoregressive Latent Trajectory Analysis**

Marleen J. ter Avest 1,2, Corina U. Greven 3,4, Marloes J. Huijbers 1, Tom F. Wilderjans 5,6,

Anne E. M. Speckens 1,2, Philip Spinhoven 7,8

***(1)*** *Center for Mindfulness, Department of Psychiatry, Radboud University Medical Center, Nijmegen, The Netherlands,* ***(2)*** *Donders Institute for Brain, Cognition and Behavior, Radboud University, Nijmegen, The Netherlands,* ***(3)*** *Radboud University Medical Centre, Donders Institute for Brain, Cognition and Behaviour, Department of Cognitive Neuroscience, Nijmegen, The Netherlands,* ***(4)*** *Karakter, Child and Adolescent Psychiatry, University Center, Nijmegen, The Netherlands,* ***(5)*** *Methodology and Statistics Research Unit, Institute of Psychology, Faculty of Social and Behavioral Sciences, Leiden University, Pieter de la Court Building, Wassenaarseweg 52, 2333 AK Leiden, The Netherlands,* ***(6)*** *Research Group of Quantitative Psychology and Individual Differences, Faculty of Psychology and Educational Sciences, Katholieke Universiteit (KU) Leuven, Tiensestraat 102, 3000 Leuven, Belgium,* ***(7)*** *Institute of Psychology , Faculty of Social and Behavioral Sciences, Leiden University, Pieter de la Court Building, Wassenaarseweg 52, 2333 AK Leiden, The Netherlands,* ***(8)*** *Department of Psychiatry, Leiden University Medical Center, Leiden, The Netherlands*

**Corresponding Author**

Marleen J. ter Avest

marleen.teravest@radboudumc.nl

+31(0)24-3615445

**Supplementary Material 2 - Result section**

*Detailed description of the studied variables, univariate and bivariate models that were fitted*

*and the results of the final univariate ALT models*

**Descriptive statistics**

The descriptive statistics of and correlations between all studied variables are presented in Tables 2.1 and 2.2.

**Univariate models**

The model fit indices of the estimated unconditional univariate models for mindfulness and positive/negative affect are shown in Table 2.3. The estimated variances and covariances/correlations of the final univariate models are presented in Table 2.4. Only the final univariate models are discussed below.

For mindfulness, as indicated in Table 2.3, the results show that -based on AIC- the ALT-full model (Model 3) substantially fitted the data better than the AR model (Model 1) and LTM (Model 2). The ALT-LTM (Model 4) fitted the data significantly worse than the ALT-full model. Removing the slope variance (Model 5) or the slope at all (Model 6) resulted in a significant decrement in model fit -according to the Δχ² statistic- compared to the ALT-full model. Finally, constraining the AR effects to be equal to each other over time (Model 7) yielded a more parsimonious model that fitted the data as good as the ALT-full model. Therefore, the model with AR constraints was considered as the final model; it had a very good fit to the data (χ² = 28.21, *df* = 22, *p* = .169, CFI = .997; TLI = .995; RMSEA = .035). The results indicate that there was a slight variability between individuals in the strength of increase in mindfulness over the entire intervention period, represented by the significant slope variance (σβMFN = .002, *s.e.* = .001, *p* = .040). Besides, individuals differed moderately in their general level of mindfulness, depicted by the significant intercept variance (σαMFN = .158, *s.e.* = .035, *p* < .001). In addition to this overall trajectory, week-to-week AR parameters were positive and significant (*ρ*AR(1) = .32, *s.e.* = .05, *p* < .001) which means that higher levels of mindfulness on a session predicted higher levels of mindfulness on the following session. The ability of mindfulness to predict later levels of mindfulness was stable over time during MBCT due to (univariate) constraint (4).

For positive affect, the AR model (Model 1) fitted poorly to the data, whereas the ALT-full model (Model 3) showed a better fit to the data than the LTM (Model 2) according to the AIC, see Table 2.3. The ALT-LTM (Model 4) yielded a significant decrease in model fit compared to the ALT-full model according to the Δχ² statistic. The same is true for the model in which the slope variance was fixed to 0 (Model 5) and for the model with no slope factor at all (Model 6). Imposing constraints to the AR parameters (Model 7) resulted in a good fitting model (χ² = 29.50, *df* = 22, *p* = .131, CFI = .994; TLI = .986; RMSEA = .038) that fitted the data as good as the more complex ALT-full model. As such, the model with AR restrictions was retained as the final model. Inspecting the parameter estimates of this final model, there was a significant positive intercept variance (σαPA = .171, *s.e.* = .044, *p* < .001), indicating inter-individual variability regarding the general level of positive affect. In addition, inter-individual variability was found regarding the strength of increase in positive affect over the entire intervention, represented by a positive significant slope variance (σβPA = .004, *s.e.* = .001, *p* = .014). Week-to-week AR effects show that higher levels of positive affect on a given session predicted higher levels of positive affect on the following session (*ρ*AR(1) = .19, *s.e.* = .05, *p* < .001). The equality constraint (4) implies that the strength of the AR effects for positive affect stayed the same during the whole MBCT course.

Finally, as can be seen in Table 2.3, the results for negative affect (logarithmic transformed) show that -based on AIC- the AR (Model 1) and LTM (Model 2) model fitted poorer to the data than the ALT-full model (Model 3). Chi-square difference testing shows that the ALT-LTM (Model 4) and the model without slope variance (Model 5) fitted the data significantly worse than the ALT-full model. Removing the slope factor (Model 6), however, did not result in a worse fitting model, implying that Model 6 was preferred over the ALT-full model. Also making the AR effects constant over time (Model 7) did not lead to a significant decrease in model fit. Therefore, Model 7 was chosen as the final model. This model, which only had an intercept but no slope factor, had a good fit to the data (χ² = 31.62, *df* = 25, *p* = .169, CFI = .992; TLI = .989; RMSEA = .034). The omission of the slope factor implies that negative affect was constant over time and that this was true for all subjects. The significant -but small- variance of the intercept factor indicates that individuals varied in their general level of negative affect (σαNA = .009, *s.e.* = .001, *p* < .001). Finally, week-to-week AR effects were observed which had the same strength over time: lower levels of negative affect on one session predicted lower levels of negative affect on the following session (*ρ*AR(1) = .23, *s.e.* = .04, *p* < .001) in addition to the overall trajectory of negative affect.

**Bivariate models**

Multiple bivariate models were fitted to examine how mindfulness and positive affect influence one another over time during MBCT. As can be seen in Table 2.5, which presents fit indices for the estimated models, the ALT-full model (Model 3) better captured the data than the AR (Model 1) and the LTM (Model 2) according to the AIC. Further, the ALT-full model showed a good model fit (CFI/TLI > .995) and was clearly superior to the ALT-LTM (Model 4; Δχ² = 267.91, *df* = 40, *p* < .001). Imposing constraints (2)-(5) (Model 5-10) resulted in models that fitted significantly worse, as shown by the accompanied significant χ2-difference tests. Constraining the AR parameters to be equal to each other over time for mindfulness (Model 11) and subsequently also for positive affect (Model 12) yielded simpler models that fitted the data as good as the ALT-full model; these more parsimonious models were therefore preferred over the ALT-full model. Finally, restricting CL relations from mindfulness to positive affect to be equal across time (Model 13) yielded a more optimal model, whereas constraining the CL parameters from positive affect to mindfulness equal to each other over time (Model 14) did not. As such, Model 13 was retained as the final model. This final model showed an excellent model fit (χ² = 83.51, *df* = 84, *p* = .495; CFI = 1.000; TLI = 1.000; RMSEA < .001).

Multiple bivariate ALT models were fitted to investigate the interplay of mindfulness and negative affect over time during MBCT for recurrent depression. The corresponding model fit indices can be found in Table 2.5. The AIC clearly showed that the ALT-full model (Model 3) fitted the data better than the AR (Model 1) and the LTM (Model 2). Based on a chi-square difference test, it was concluded that the ALT-full model was preferred over the ALT-LTM (Model 4). Removing the slope factor variance for negative affect (Model 5) and next removing the negative affect slope factor at all (Model 6) did not significantly decrease model fit. As Model 6 was the most parsimonious model among these three models, it was preferred over the other two models. A significant decrease in model fit was observed when the slope factor for mindfulness (Model 8) and its variance (Model 7) were removed from the model. Also removing the time-specific error correlations (Model 9) resulted in a worse fitting model. However, making time-specific error correlations equal to each other over time did not significantly make the model fit worse (Model 10). Setting AR (Model 11 and 12) and CL parameters (Model 13 and 14) equal to each other over time led to more parsimonious models that fitted the data equally well. Model 14 was therefore retained as the final model and it showed a good model fit (χ² = 106.67, *df* = 102, *p* = .356; CFI = .998; TLI = .998; RMSEA = .014).

| Table 2.1  *Correlations between and univariate statistics of mindfulness and positive affect during 8 sessions of mindfulness-based cognitive therapy* | | | | | | | | | | | | | | | | | |
| --- | --- | --- | --- | --- | --- | --- | --- | --- | --- | --- | --- | --- | --- | --- | --- | --- | --- |
|  | Mindfulness *a* | | | | | | | |  | Positive affect*b* | | | | | | | |
|  | S1 | S2 | S3 | S4 | S5 | S6 | S7 | S8 |  | S1 | S2 | S3 | S4 | S5 | S6 | S7 | S8 |
| MFN.S1 |  |  |  |  |  |  |  |  |  |  |  |  |  |  |  |  |  |
| MFN.S2 | .811** |  |  |  |  |  |  |  |  |  |  |  |  |  |  |  |  |
| MFN.S3 | .663** | .827** |  |  |  |  |  |  |  |  |  |  |  |  |  |  |  |
| MFN.S4 | .603** | .753** | .824** |  |  |  |  |  |  |  |  |  |  |  |  |  |  |
| MFN.S5 | .563** | .735** | .828** | .869** |  |  |  |  |  |  |  |  |  |  |  |  |  |
| MFN.S6 | .590** | .704** | .808** | .821** | .888** |  |  |  |  |  |  |  |  |  |  |  |  |
| MFN.S7 | .491** | .671** | .803** | .808** | .832** | .867** |  |  |  |  |  |  |  |  |  |  |  |
| MFN.S8 | .349** | .569** | .715** | .720** | .790** | .822** | .873** |  |  |  |  |  |  |  |  |  |  |
| PA.S1 | .365** | .331** | .333** | .316** | .301** | .351** | .325** | .249** |  |  |  |  |  |  |  |  |  |
| PA.S2 | .340** | .396** | .469** | .395** | .433** | .406** | .395** | .338** |  | .707** |  |  |  |  |  |  |  |
| PA.S3 | .283** | .353** | .509** | .373** | .442** | .387** | .399** | .414** |  | .571** | .624** |  |  |  |  |  |  |
| PA.S4 | .242** | .242** | .302** | .436** | .394** | .366** | .346** | .374** |  | .538** | .586** | .619** |  |  |  |  |  |
| PA.S5 | .259** | .326** | .383** | .440** | .484** | .469** | .408** | .418** |  | .581** | .650** | .660** | .717** |  |  |  |  |
| PA.S6 | .245** | .269** | .334** | .391** | .425** | .519** | .443** | .430** |  | .584** | .556** | .559** | .628** | .701** |  |  |  |
| PA.S7 | .180* | .206** | .321** | .272** | .342** | .367** | .444** | .439** |  | .488** | .517** | .646** | .578** | .633** | .714** |  |  |
| PA.S8 | .086 *ns* | .139 | .245** | .224** | .314** | .411** | .429** | .541** |  | .507** | .515** | .528** | .556** | .606** | .709** | .729** |  |
| *M* | 3.22 | 3.17 | 3.29 | 3.40 | 3.51 | 3.59 | 3.65 | 3.73 |  | 2.67 | 2.73 | 2.76 | 2.81 | 2.83 | 2.87 | 2.91 | 3.00 |
| *SD* | .66 | .64 | .68 | .69 | .70 | .76 | .75 | .77 |  | .69 | .66 | .64 | .72 | .71 | .74 | .75 | .80 |
|  | .19 | .21 | .04 | .21 | .30 | .29 | .36 | .29 |  | .20 | .17 | .10 | .10 | .03 | .17 | - .02 | .02 |
|  | - .10 | .84 | .94 | .43 | .54 | .18 | .10 | .60 |  | - .03 | .35 | - .05 | .27 | .20 | .43 | .03 | - .21 |
| *Note.* MFN = mindfulness; PA = positive affect; S1-8 = session 1-8; *M* = mean; *SD* = standard deviation; = skewness; = kurtosis. Level of significance is indicated for the correlations only. *a*Available *n* decreases from 222 to 164 across S1-8. *b*Available *n* decreases from 218 to 162 across S1-8. | | | | | | | | | | | | | | | | | |
| *ns* *p* ≥ .050, * *p* < .050, ** *p* < .010. | | | | | | | | | | | | | | | | | |

| Table 2.2  *Correlations between and univariate statistics of mindfulness and negative affect during 8 sessions of mindfulness-based cognitive therapy* | | | | | | | | |
| --- | --- | --- | --- | --- | --- | --- | --- | --- |
|  | Negative affect*a, b* | | | | | | | |
|  | S1 | S2 | S3 | S4 | S5 | S6 | S7 | S8 |
| NA.S1 |  |  |  |  |  |  |  |  |
| NA.S2 | .716** |  |  |  |  |  |  |  |
| NA.S3 | .617** | .664** |  |  |  |  |  |  |
| NA.S4 | .512** | .590** | .676** |  |  |  |  |  |
| NA.S5 | .505** | .629** | .544** | .624** |  |  |  |  |
| NA.S6 | .469** | .540** | .538** | .541** | .696** |  |  |  |
| NA.S7 | .462** | .452** | .485** | .553** | .464** | .543** |  |  |
| NA.S8 | .480** | .528** | .516** | .504** | .587** | .594** | .575** |  |
| MFN.S1 | - .283** | - .319** | - .242** | - .207** | - .203** | - .206** | - .188* | - .145 *ns* |
| MFN.S2 | - .299** | - .419** | - .307** | - .273** | - .291** | - .258** | - .226** | - .205** |
| MFN.S3 | - .272** | - .366** | - .383** | - .340** | - .340** | - .311** | - .300** | - .305** |
| MFN.S4 | - .241** | - .310** | - .289** | - .432** | - .285** | - .307** | - .233** | - .228** |
| MFN.S5 | - .202** | - .281** | - .323** | - .342** | - .382** | - .332** | - .209** | - .260** |
| MFN.S6 | - .291** | - .327** | - .336** | - .341** | - .353** | - .418** | - .298** | - .335** |
| MFN.S7 | - .249** | - .312** | - .262** | - .379** | - .332** | - .364** | - .407** | - .314** |
| MFN.S8 | - .160** | - .233* | - .283** | - .321** | - .304** | - .380** | - .312** | - .410** |
| *M* | 2.14 | 2.01 | 2.05 | 2.14 | 1.97 | 2.02 | 1.97 | 1.89 |
| *SD* | .74 | .76 | .87 | .82 | .75 | .83 | .76 | .75 |
|  | .79 | .85 | .02 | .66 | .89 | 1.06 | .82 | 1.11 |
|  | .17 | .37 | .56 | - .35 | .23 | 1.10 | .29 | 1.16 |
| *Note.* MFN = mindfulness; NA = negative affect; S1-8 = session 1-8; *M* = mean; *SD* = standard deviation; = skewness; = kurtosis. Level of significance is indicated for the correlations only. *a*The original, untransformed variable of negative affect is used. *b* Available *n* decreases from 218 to 163 across S1-8. | | | | | | | | |
| *ns* *p* ≥ .050, * *p* < .050, ** *p* < .010. | | | | | | | | |

| Table 2.3  *Model fit indices for the unconditional univariate Autoregressive (AR) models, Latent Trajectory Models (LTM) and Autoregressive Latent Trajectory (ALT) models for mindfulness, positive affect and negative affect* | | | | | | | | |
| --- | --- | --- | --- | --- | --- | --- | --- | --- |
|  |  | χ² (*df*) | CM | Δχ² (*df*) | CFI | TLI | RMSEA | AIC |
| *Mindfulness* | |  |  |  |  |  |  |  |
| 1 | AR | 116.12 (*21*)*** |  |  | .949 | .913 | .139 | 162.116 |
| 2 | LTM | 97.38 (*25*)*** |  |  | .961 | .944 | .111 | 135.383 |
| 3 | ALT-full | 21.83 (*16*) *ns* |  |  | .997 | .993 | .039 | 77.829 |
| 4 | ALT-LTM | 86.98 (*23*)*** | 3 | 65.15 (*7*)*** | .966 | .947 | .109 | 128.983 |
| 5 | ALT-no slope variance | 26.93 (*17*) *ns* | 3 | 5.10 (*1*)* | .995 | .989 | .050 | 80.931 |
| 6 | ALT-no slope | 43.18 (*19*)*** | 3 | 21.35 (*3*) *** | .987 | .976 | .074 | 93.178 |
| **7** | **ALT-autoregressive constraints** | **28.21 (*22*)*****ns*** | **3** | **6.38 (*6*) *ns*** | **.997** | **.995** | **.035** | **72.212** |
| *Positive affect* | |  |  |  |  |  |  |  |
| 1 | AR | 172.96 (*21*)*** |  |  | .848 | .739 | .176 | 218.956 |
| 2 | LTM | 49.30 (*25*)** |  |  | .976 | .965 | .064 | 87.304 |
| 3 | ALT-full | 22.17 (*16*) *ns* |  |  | .994 | .986 | .041 | 78.170 |
| 4 | ALT-LTM | 45.71 (*23*)** | 3 | 23.54 (*7*)** | .977 | .964 | .065 | 87.713 |
| 5 | ALT-no slope variance | 31.58 (*17*)* | 3 | 9.41 (*1*)* | .985 | .969 | .061 | 85.578 |
| 6 | ALT-no slope | 33.87 (*19*)* | 3 | 11.70 (*3*)** | .985 | .972 | .058 | 83.868 |
| **7** | **ALT-autoregressive constraints** | **29.50 (*22*)*****ns*** | **3** | **7.33 (*6*) *ns*** | **.994** | **.986** | **.038** | **73.501** |
| *Negative affect a* | |  |  |  |  |  |  |  |
| 1 | AR | 192.45 (*21*)*** |  |  | .804 | .663 | .187 | 238.453 |
| 2 | LTM | 50.11 (*25*)** |  |  | .971 | .959 | .066 | 88.109 |
| 3 | ALT-full | 20.09 (*16*) *ns* |  |  | .995 | .989 | .033 | 76.085 |
| 4 | ALT-LTM | 41.74 (*23*)* | 3 | 21.65 (*7*)** | .979 | .966 | .059 | 83.738 |
| 5 | ALT-no slope variance | 24.04 (*17*) *ns* | 3 | 3.96 (*1*)* | .992 | .983 | .042 | 78.044 |
| 6 | ALT-no slope | 25.50 (*19*) *ns* | 3 | 5.42 (*3*) *ns* | .993 | .986 | .038 | 75.504 |
| **7** | **ALT-autoregressive constraints** | **31.62 (*25*)*****ns*** | **6** | **6.12 (*6*) *ns*** | **.992** | **.989** | **.034** | **69.619** |
| *Note.* χ² = chi-square test of model fit; *df* = degrees of freedom; Δχ² = chi-square difference test; CM = comparison model in the Δχ²; CFI = comparative fit index; TLI = Tucker-Lewis index; RMSEA = root-mean-square error of approximation; AIC = Akaike information criterion. The final model is shown in bold.  *a* Negative affect is on a logarithmic scale.  *ns* *p* ≥ .050, * *p* < .050, ** *p* < .010, *** *p* < .001. | | | | | | | | |

| Table 2.4  *Variances, covariances and correlations between the first measurement (session 1) and the intercept and slope factor for mindfulness, positive affect and negative affect based on the final univariate ALT model* | | | | | | | |
| --- | --- | --- | --- | --- | --- | --- | --- |
|  |  | Session 1 |  | Intercept |  | Slope |  |
| *Mindfulness* |  |  |  |  |  |  |  |
| Session 1 |  | .423*** (.040) |  | .775 |  | -.266 |  |
| Intercept |  | .200*** (.031) |  | .158*** (.035) |  | .014 |  |
| Slope |  | -.007* (.003) |  | < .001 *ns* |  | .002* (.001) |  |
| *Positive affect* |  |  |  |  |  |  |  |
| Session 1 |  | .466*** (.044) |  | .741 |  | .070 |  |
| Intercept |  | .209*** (.034) |  | .171*** (.044) |  | -.070 |  |
| Slope |  | .003 *ns* (.005) |  | -.002 *ns* (.005) |  | .004* (.001) |  |
| *Negative affect a* |  |  |  |  |  |  |  |
| Session 1 |  | .021*** (.002) |  | .734 |  | - |  |
| Intercept |  | .010*** (.001) |  | .009*** (.001) |  | - |  |
| Slope |  | - |  | - |  | - |  |
| *Note.* Variances are depicted on the diagonal, covariances below and correlations above the diagonal for each variable separately. Standard errors are shown between parenthesis. Level of significance is indicated for the covariances and variances only.  *a* Negative affect is on a logarithmic scale. | | | | | | |  |
| *ns p* ≥ .050, * *p* < .050, ** *p* < .010, *** *p* < .001. | | | | | | |  |

| Table 2.5  *Model fit indices for the unconditional bivariate Autoregressive (AR) models, Latent Trajectory Models (LTM) and Autoregressive Latent Trajectory (ALT) models of mindfulness and positive affect, and of mindfulness and negative affect* | | | | | | | | |
| --- | --- | --- | --- | --- | --- | --- | --- | --- |
| *Mindfulness and positive affect* | | χ² (*df*) | CM | Δχ² (*df*) | CFI | TLI | RMSEA | AIC |
| *1* | AR | 342.63 (*84*)*** |  |  | .917 | .866 | .115 | 478.630 |
| *2* | LTM | 333.92 (*110*)*** |  |  | .928 | .912 | .093 | 417.917 |
| *3* | ALT-full | 70.39 (*66*) *ns* |  |  | .999 | .997 | .017 | 242.394 |
| *4* | ALT-LTM | 338.30 (*106*)*** | 3 | 267.91 (*40*)*** | .926 | .905 | .097 | 430.302 |
| *5* | ALT-no slope variance on PA | 78.32 (*67*) *ns* | 3 | 7.93 (*1*)** | .996 | .993 | .027 | 248.232 |
| *6* | ALT-no slope on PA | 83.91 (*72*) *ns* | 3 | 13.52 (*6*)* | .996 | .993 | .027 | 243.914 |
| *7* | ALT-no slope variance on MFN | 87.90 (*73*) *ns* | 3 | 17.51 (*7*)* | .995 | .991 | .030 | 245.904 |
| *8* | ALT-no slope on MFN | 109.98 (*77*)** | 3 | 39.59 (*11*)*** | .989 | .981 | .043 | 259.979 |
| *9* | ALT-no time-specific error correlations | 131.00 (*73*)*** | 3 | 60.61 (*7*)*** | .981 | .965 | .058 | 289.001 |
| *10* | ALT-time-specific error correlation constraints | 84.13 (*72*) *ns* | 3 | 13.74 (*6*)* | .996 | .993 | .027 | 244.134 |
| *11* | ALT-autoregression constraints for MFN | 72.96 (*72*) *ns* | 3 | 2.57 (*6*) *ns* | 1.000 | .999 | .008 | 232.962 |
| *12* | ALT-autoregression constraints for PA | 79.42 (*78*) *ns* | 11 | 6.46 (*6*) *ns* | 1.000 | .999 | .009 | 227.417 |
| ***13*** | **ALT-cross-lagged constraints for MFN 🡪 PA** | **83.51 (*84*)*****ns*** | **12** | **4.09 (*6*) *ns*** | **1.000** | **1.000** | **< .001** | **219.509** |
| *14* | ALT-cross-lagged constraints for PA 🡪 MFN | 97.96 (*90*) *ns* | 13 | 14.45 (*6*)* | .997 | .996 | .019 | 221.962 |
| *Mindfulness and negative affect* | | χ² (*df*) | CM | Δχ² (*df*) | CFI | TLI | RMSEA | AIC |
| *1* | AR | 339.92 (*84*)*** |  |  | .921 | .858 | .114 | 475.920 |
| *2* | LTM | 314.52 (*110*)*** |  |  | .930 | .913 | .089 | 398.523 |
| *3* | ALT-full | 74.29 (*66*) *ns* |  |  | .997 | .994 | .023 | 246.286 |
| *4* | ALT-LTM | 309.02 (*106*)*** | 3 | 234.74 (*40*)*** | .931 | .991 | .090 | 401.024 |
| *5* | ALT-no slope variance on NA | 77.69 (*67*) *ns* | 3 | 3.41 (*1*) *ns* | .996 | .993 | .026 | 247.694 |
| *6* | ALT-no slope on NA | 79.70 (*72*) *ns* | 5 | 2.00 (*5*) *ns* | .997 | .995 | .021 | 239.699 |
| *7* | ALT-no slope variance on MFN | 87.46 (*73*) *ns* | 6 | 7.77 (*1*) ** | .995 | .991 | .029 | 245.464 |
| *8* | ALT-no slope on MFN | 107.05 (*77*)* | 6 | 27.35 (*5*) *** | .990 | .982 | .041 | 257.053 |
| *9* | ALT-no time-specific error correlations | 215.26 (*79*)*** | 6 | 135.56 (*7*) *** | .953 | .920 | .086 | 361.260 |
| *10* | ALT-time-specific error correlation constraints | 89.65 (*78*) *ns* | 6 | 9.95 (*6*) *ns* | .996 | .993 | .025 | 237.645 |
| *11* | ALT-autoregression constraints for MFN | 96.44 (*84*) *ns* | 10 | 6.79 (*6*) *ns* | .996 | .993 | .025 | 232.439 |
| *12* | ALT-autoregression constraints for NA | 100.94 (*90*) *ns* | 11 | 4.50 (*6*) *ns* | .996 | .994 | .023 | 224.944 |
| *13* | ALT-cross-lagged constraints MFN 🡪 NA | 104.67 (*96*) *ns* | 12 | 3.73 (*6*) *ns* | .997 | .996 | .020 | 216.671 |
| ***14*** | **ALT-cross-lagged constraints NA 🡪 MFN** | **106.67 (*102*) *ns*** | **13** | **2.00 (*6*) *ns*** | **.998** | **.998** | **.014** | **206.668** |
| *Note.* MFN = mindfulness; PA = positive affect; NA = negative affect (logarithmic transformed); χ² = chi-square test of model fit; *df* = degrees of freedom; Δχ² = chi-square difference test; CM = comparison model in the Δχ²; CFI = comparative fit index; TLI = Tucker-Lewis index; RMSEA = root-mean-square error of approximation; AIC = Akaike information criterion. The final model is shown in bold.  *ns* *p* ≥ .050, * *p* < .050, ** *p* < .010, *** *p* < .001. | | | | | | | | |
